# Supplementary material
Source: PubMed Central journal article supplement (PMC3719980)
Supplement: NIHMS468505-supplement-468505_Suppl_1.pdf [file NIHMS468505-supplement-468505_Suppl_1.pdf]

**Appendix 1: FECD Map of Sites**

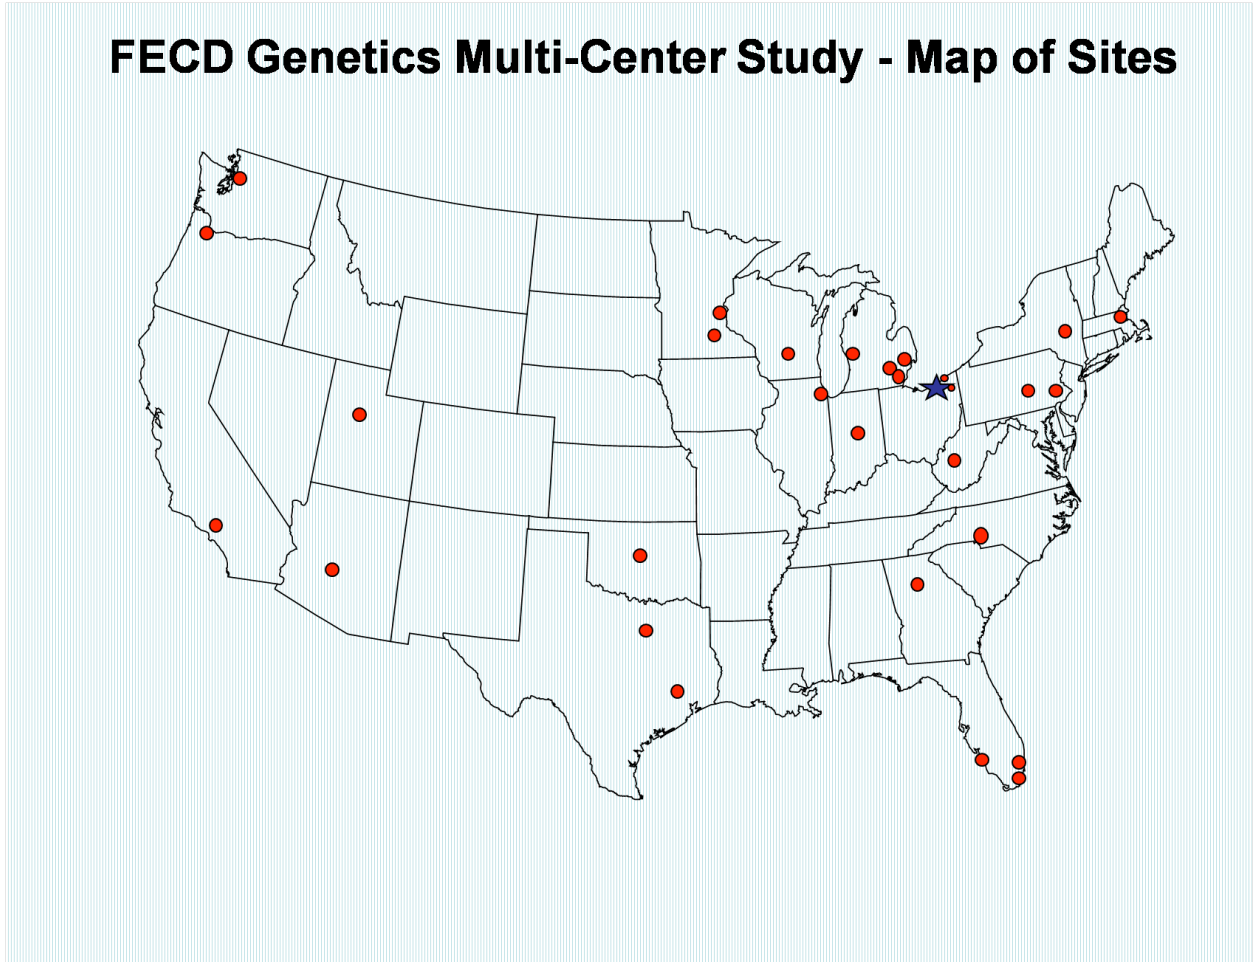

Location of clinical enrollment sites. The Coordinating Center is indicated with a star.
