# Supplementary material
Source: PubMed Central journal article supplement (PMC3719980)
Supplement: NIHMS468505-supplement-468505_Suppl_2.pdf [file NIHMS468505-supplement-468505_Suppl_2.pdf]

**Appendix 2: FECD\* Grading Scale**

| Affection Status | Grade | Criteria (central/paracentral corneal guttae)                                |
|------------------|-------|------------------------------------------------------------------------------|
| Unaffected       | 0     | no guttae                                                                    |
| Intermediate     | 1     | 1-12 non-confluent                                                           |
|                  | 2     | more than 12 non-confluent                                                   |
|                  | 3     | 1-2mm confluent                                                              |
| Severe           | 4     | 2-5mm confluent                                                              |
|                  | 5     | greater than 5mm confluent                                                   |
|                  | 6     | greater than 5mm confluent with clinically apparent stromal/epithelial edema |

\* Fuchs' Endothelial Corneal Dystrophy
