# Supplementary material
Source: PubMed Central journal article supplement (PMC3719980)
Supplement: NIHMS468505-supplement-468505_Suppl_3.pdf [file NIHMS468505-supplement-468505_Suppl_3.pdf]

### **Appendix 3: FECD Study Investigator Group**

#### **Clinical Sites**

Listed in order of number of families enrolled in the FECD Genetics Study are the clinical sites with city and state; site name; number of families; and names of the investigators who participated in the study as part of the Investigator Group, ordered alphabetically.

1. Price Vision Group; Indianapolis, Indiana (70). Francis W. Price, Jr., MD, Kathleen Kelly, OD.
2. Eye Consultants of Atlanta; Atlanta, Georgia (33). Stephen Hamilton, MD, Barry Lee, MD.
3. Mayo Clinic; Rochester, Minnesota (27). Sanjay Patel, MD, Keith H. Baratz, MD, William Bourne, MD, Leo Maguire, MD.
4. Davis Duehr Dean Clinic; Madison, Wisconsin (24). Christopher R. Croasdale, MD.
5. Case Western Reserve University and University Hospitals Eye Institute; Cleveland, Ohio (23). Jonathan Lass, MD, William Reinhart, MD.
6. Central Pennsylvania Eye Center; Hershey, Pennsylvania (21). George Rosenwasser, MD.
7. Verdier Eye Center, P.C.; Grand Rapids, Michigan (21). David D. Verdier, MD.
8. University of Texas Southwestern Medical Center at Dallas; Dallas, Texas (20). Vinod Mootha, MD, Wayne Bowman, MD, H. Dwight Cavanagh, MD, PhD, James P. McCulley, MD, Steven Verity, MD.

9. University of Illinois at Chicago; Chicago, Illinois (18). Joel Sugar, MD, Elmer Tu, MD.
10. Ophthalmic Consultants Northwest; Seattle, Washington (16). Matthew S. Oliva, MD (now with Medical Eye Center, Medford, OR), Walter M. Rotkis, MD.
11. University of Texas, Houston; Houston, Texas (14). Richard Yee, MD, Mark Vital, MD.
12. Charleston Eye Care, PLLC; Charleston, West Virginia (12). James W. Caudill, MD.
13. Jefferson University, Wills Eye Hospital; Philadelphia, Pennsylvania (12). Kristin Hammersmith, MD, Brandon Ayres, MD, Elizabeth Cohen, MD, Peter Laibson, MD, Christopher Rapuano, MD.
14. Massachusetts Eye and Ear Infirmary, Harvard Medical School; Boston, Massachusetts (12). Kathryn Colby, MD, PhD, Ula Jurkunas, MD.
15. Michigan Cornea Consultants, PC; Southfield, Michigan, (12). Steven P. Dunn, MD, David G. Heidemann, MD.
16. W. K. Kellogg Eye Center, University of Michigan; Ann Arbor, Michigan (12). Alan Sugar, MD, Shahzad Mian, MD, H. Kaz Soong, MD.
17. Bascom Palmer Eye Institute, University of Miami; Miami, Florida (11). Eduardo Alfonso, MD, Carol Karp, MD, Yunhee Lee, MD, Sonia Yoo, MD.
18. Gorovoy Eye Specialists; Fort Myers, Florida (10). Mark Gorovoy, MD.
19. Delray Eye Associates, P.A.; Delray Beach, Florida (9). Steven I. Rosenfeld, MD.

20. The Jules Stein Eye Institute, University of California, Los Angeles; Los Angeles, California (9). Anthony J. Aldave, M.D.
21. Minnesota Eye Consultants, P.A.; Minneapolis, Minnesota (9). Marlene Brown, OD, Elizabeth A. Davis, MD, Ahmad Fahmy, OD, David R. Hardten, MD, Scott Hauswirth, OD, Richard L. Lindstrom, MD.
22. John Moran Eye Center, University of Utah; Salt Lake City, Utah (7). Mark D. Mifflin, MD, Randall Olson, MD.
23. Dean A. McGee Eye Institute, University of Oklahoma; Oklahoma City, Oklahoma (6). Donald Stone, MD.
24. Cleveland Clinic Foundation; Cleveland, Ohio (5). B. J. Dupps, MD, PhD, David M. Meisler, MD.
25. Cornea Consultants of Arizona; Phoenix, Arizona (5). Brandon Suedekum, MD.
26. Devers Eye Institute; Portland, Oregon (5). Neda Shamie, MD, Mark A. Terry, MD.
27. Henry Ford Medical Center; Troy, Michigan (5). Samir Shah, MD.
28. Cornea Consultants of Albany; Albany, New York (4). Michael W. Belin, MD (now at the University of Arizona, Tucson, AZ), Todd Morason, MD, Robert L. Schultze, MD.
29. Horizon Eye Care; Charlotte, North Carolina (1). Paul G. Galentine, MD.
